# Supplementary material for: Prevalence and determinants of type 2 diabetes among lean African migrants and non-migrants: the RODAM study
Source: PubMed Central journal article supplement (PMC6815658; doi:10.7189/jogh.09.020426), 2019-12
Supplement: jogh-09-020426-s001.pdf [file jogh-09-020426-s001.pdf]

**Figure S1: Flow chart of participation by site**

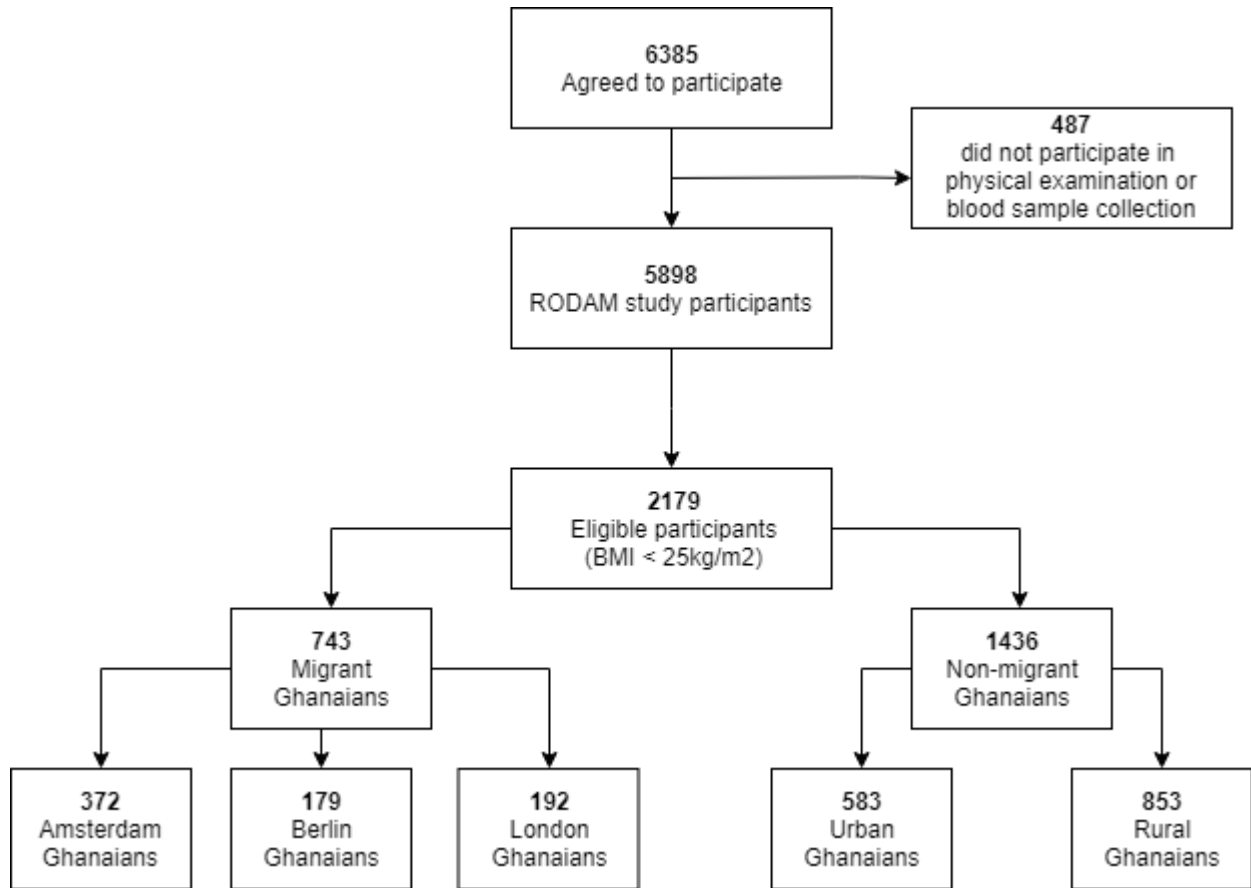

**Table S1: Adjusted odds ratios and attributable risk for impaired fasting glucose per SD increase in HOMA-IR AND Inverse HOMA-B**

|                 | <b>1SD</b> | <b>Model 1*</b>   | <b>Model 2 †</b>   | <b>Attributable risk (AR) %<br/>for Model 2</b> |
|-----------------|------------|-------------------|--------------------|-------------------------------------------------|
|                 |            | OR (95%CI)        | OR(95%CI)          | AR(95%CI)                                       |
| HOMA-IR‡        | 1.53       | 9.89(6.96-14.07)  | 9.83(6.91-13.99)   | 32.86(27.02-38.70)                              |
| Inverse HOMA-B‡ | 0.05       | 15.04(9.57-23.63) | 16.07(10.16-25.41) | 43.57(35.30-51.84)                              |

\* Adjusted for age and sex

† Adjusted for age sex and location of residency (rural Ghana, urban Ghana and Europe)

‡ HOMA –IR and inverse HOMA-B were z-standardized to make them comparable
